# Supplementary material for: Associations between Meteorological Parameters and Influenza Activity in Berlin (Germany), Ljubljana (Slovenia), Castile and León (Spain) and Israeli Districts
Source: PubMed Central journal article supplement (PMC4550247; doi:10.1371/journal.pone.0134701), 2015-08-26
Supplement: pone.0134701.s001.pdf [file pone.0134701.s001.pdf]

# S1 APPENDIX

## Specific Humidity Model with Different Meteorological Parameters Average Periods

### 1 Meteorological variables averaged from previous 1 to 3 weeks

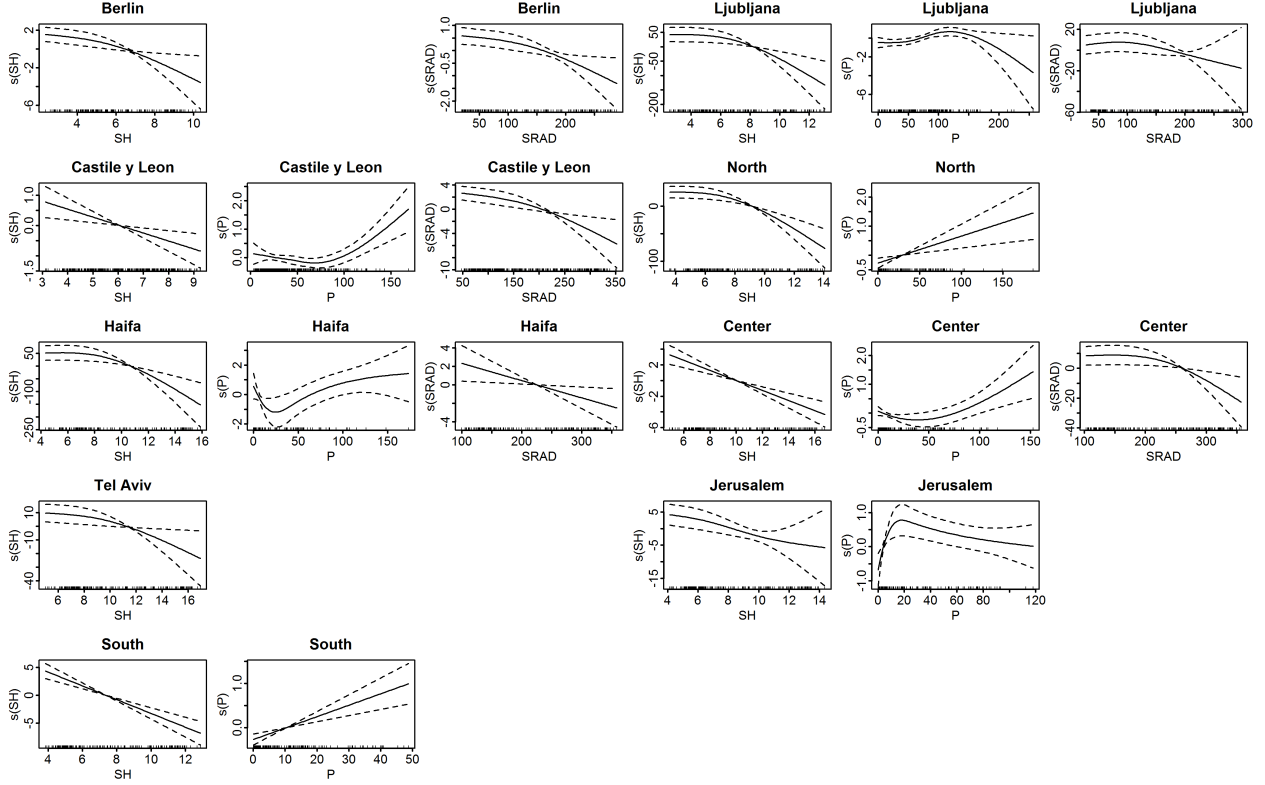

Fig. A. Resulting meteorological smooth terms. Only terms that are significant are plotted. The y-axis is in the log scale and normalized, x-axis is the value of the meteorological variable. SH = specific humidity, P = Precipitation, SRAD = Solar Radiation.

Table A. Meteorological smooth term effective degree of freedom and p-value in parenthesis

|                | Specific Humidity | Precipitation | Solar Radiation | Adj.Rsq | % Dev. Expl. |
|----------------|-------------------|---------------|-----------------|---------|--------------|
| Berlin         | 1.69 (3e-05)      |               | 1.56 (0.02)     | 0.73    | 77.6         |
| Ljubljana      | 1.89 (3e-05)      | 2.77 (0.02)   | 1.96 (0.02)     | 0.41    | 67.8         |
| Castile Y Leon | 1 (0.003)         | 2.38 (0.006)  | 1.75 (2e-09)    | 0.56    | 72.5         |
| North          | 1.92 (4e-11)      | 1 (0.002)     |                 | 0.45    | 72.2         |
| Haifa          | 1.92 (6e-04)      | 2.82 (2e-04)  | 1 (0.02)        | 0.33    | 64.1         |
| Center         | 1 (2e-07)         | 1.83 (0.006)  | 1.89 (0.03)     | 0.62    | 85.1         |
| Tel Aviv       | 1.76 (4e-09)      |               |                 | 0.61    | 77.5         |
| Jerusalem      | 1.83 (2e-05)      | 2.89 (7e-05)  |                 | 0.77    | 88.5         |
| South          | 1 (1e-09)         | 1 (3e-05)     |                 | 0.55    | 73.8         |

## 2 Meteorological variables averaged from previous 1 to 2 weeks

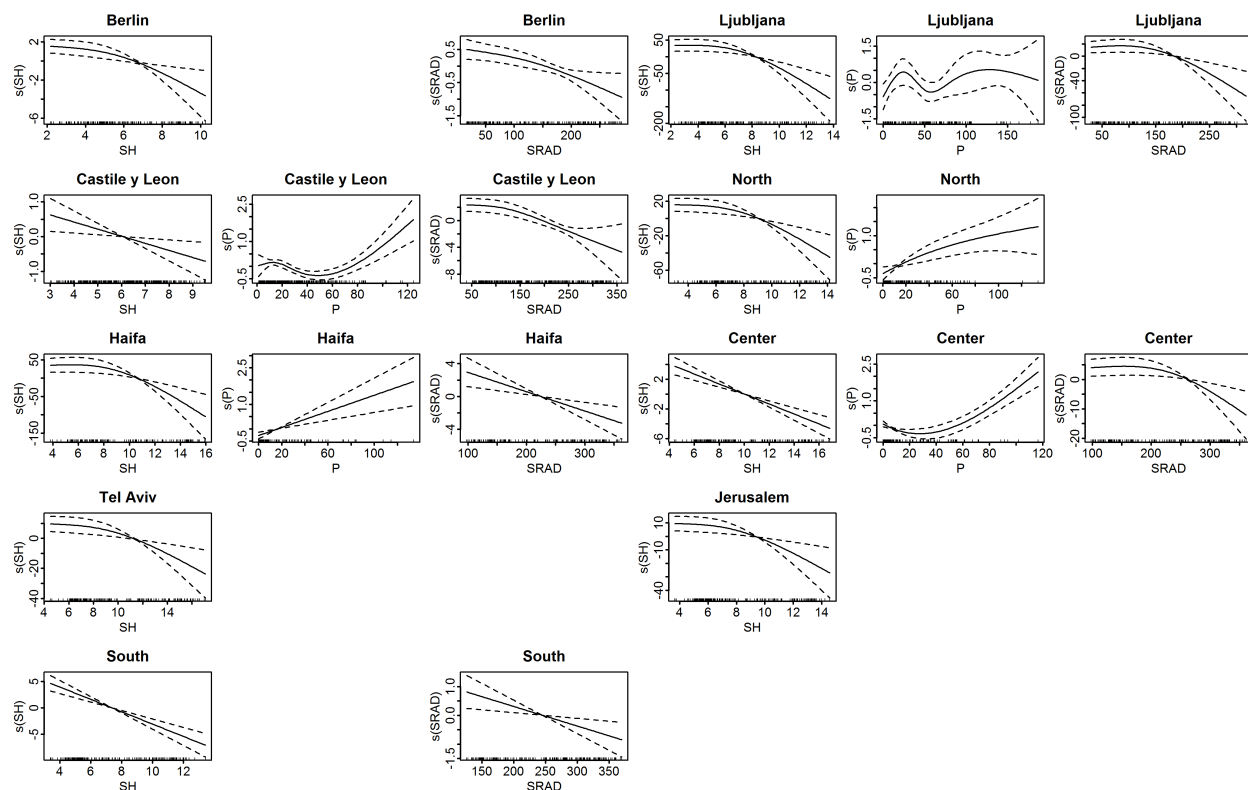

Fig. B. Resulting meteorological smooth terms. Only terms that are significant are plotted. The y-axis is in the log scale and normalized, x-axis is the value of the meteorological variable. SH = specific humidity, P = Precipitation, SRAD = Solar Radiation.

Table B. Meteorological smooth term effective degree of freedom and p-value in parenthesis

|                | Specific Humidity | Precipitation | Solar Radiation | Adj.Rsq | % Dev. Expl. |
|----------------|-------------------|---------------|-----------------|---------|--------------|
| Berlin         | 1.69 (3e-05)      |               | 1.56 (0.02)     | 0.73    | 77.6         |
| Ljubljana      | 1.92 (4e-04)      | 3.77 (0.03)   | 1.91 (0.007)    | 0.37    | 67.9         |
| Castile Y Leon | 1 (0.009)         | 2.69 (4e-05)  | 1.99 (1e-08)    | 0.57    | 72.9         |
| North          | 1.87 (6e-11)      | 1.43 (0.007)  |                 | 0.45    | 72.2         |
| Haifa          | 1.91 (2e-04)      | 1 (1e-04)     | 1 (0.001)       | 0.36    | 60.7         |
| Center         | 1 (2e-09)         | 1.96 (6e-11)  | 1.9 (0.01)      | 0.87    | 88.0         |
| Tel Aviv       | 1.81 (2e-09)      |               |                 | 0.64    | 77.6         |
| Jerusalem      | 1.84 (8e-09)      |               |                 | 0.73    | 86.6         |
| South          | 1 (2e-09)         |               | 1 (0.005)       | 0.57    | 74.0         |
