# Supplementary material for: Associations between Meteorological Parameters and Influenza Activity in Berlin (Germany), Ljubljana (Slovenia), Castile and León (Spain) and Israeli Districts
Source: PubMed Central journal article supplement (PMC4550247; doi:10.1371/journal.pone.0134701), 2015-08-26
Supplement: pone.0134701.s002.pdf [file pone.0134701.s002.pdf]

## S2 APPENDIX

### Minimum Temperature Model with Different Meteorological Parameters Average Periods

#### 1 Meteorological variables averaged from previous 1 to 3 weeks

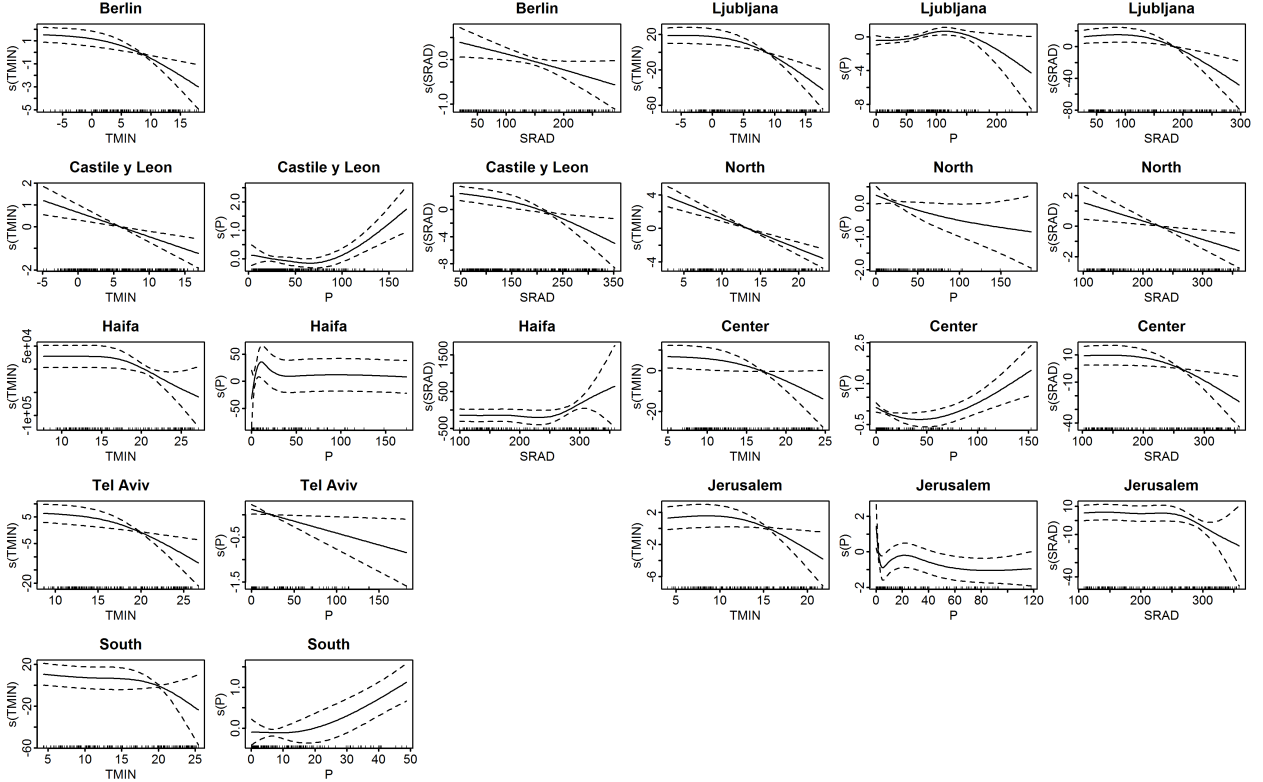

Fig. A. Resulting meteorological smooth terms. Only terms that are significant are plotted. The y-axis is in the log scale and normalized, x-axis is the value of the meteorological variable. TMIN = minimum temperature, P = Precipitation, SRAD = Solar Radiation.

Table A. Meteorological smooth term effective degree of freedom and p-value in parenthesis

|                | Minimum Temperature | Precipitation | Solar Radiation | Adj.Rsq | % Dev. Expl. |
|----------------|---------------------|---------------|-----------------|---------|--------------|
| Berlin         | 1.8 (1e-04)         |               | 1.05 (0.04)     | 0.72    | 77.2         |
| Ljubljana      | 1.93 (6e-07)        | 2.77 (0.04)   | 1.91 (9e-04)    | 0.44    | 68.8         |
| Castile Y Leon | 1 (3e-04)           | 2.3 (0.01)    | 1.69 (2e-08)    | 0.56    | 72.9         |
| North          | 1 (3e-09)           | 1.23 (0.05)   | 1 (0.005)       | 0.45    | 70.1         |
| Haifa          | 2.64 (9e-06)        | 3.98 (4e-05)  | 3.86 (4e-05)    | 0.52    | 83.4         |
| Center         | 1.7 (0.002)         | 1.84 (0.002)  | 1.88 (0.03)     | 0.64    | 84.6         |
| Tel Aviv       | 1.82 (2e-06)        | 1 (0.02)      |                 | 0.58    | 75.8         |
| Jerusalem      | 1.85 (0.05)         | 3.91 (3e-05)  | 3.85 (4e-04)    | 0.80    | 88.6         |
| South          | 2.75 (8e-13)        | 1.68 (2e-05)  | 2.02 (0.1)      | 0.72    | 78.3         |

## 2 Meteorological variables averaged from previous 1 to 2 weeks

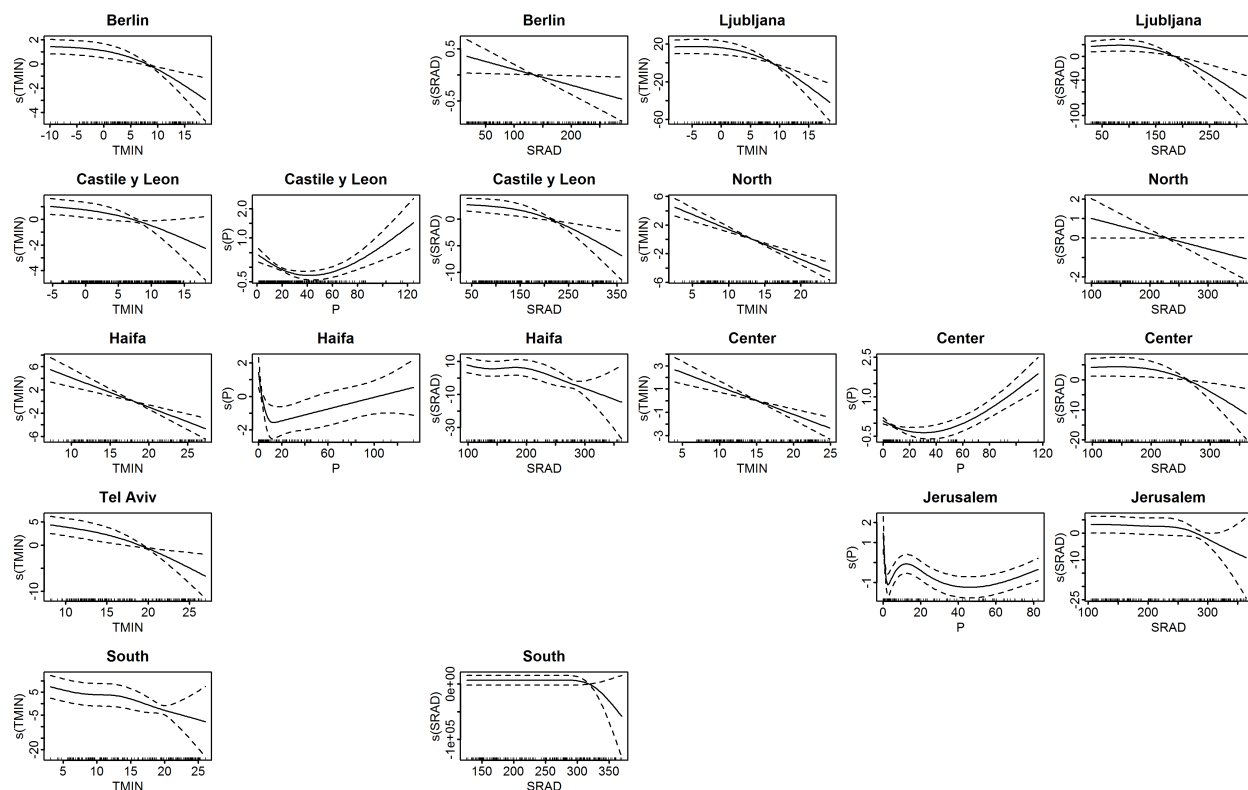

Fig. B. Resulting meteorological smooth terms. Only terms that are significant are plotted. The y-axis is in the log scale and normalized, x-axis is the value of the meteorological variable. TMIN = minimum temperature, P = Precipitation, SRAD = Solar Radiation.

Table B. Meteorological smooth term effective degree of freedom and p-value in parenthesis

|                | Minimum Temperature | Precipitation | Solar Radiation | Adj.Rsq | % Dev. Expl. |
|----------------|---------------------|---------------|-----------------|---------|--------------|
| Berlin         | 1.81 (1e-04)        |               | 1 (0.03)        | 0.72    | 77.2         |
| Ljubljana      | 1.95 (5e-08)        |               | 1.94 (0.001)    | 0.41    | 70.9         |
| Castile Y Leon | 1.49 (0.002)        | 1.94 (1e-04)  | 1.81 (4e-07)    | 0.56    | 72.7         |
| North          | 1 (1e-11)           | 1 (0.08)      | 1 (0.05)        | 0.56    | 73.1         |
| Haifa          | 1 (8e-07)           | 2.88 (0.004)  | 2.99 (0.002)    | 0.52    | 65.8         |
| Center         | 1 (1e-06)           | 1.95 (2e-08)  | 1.88 (0.03)     | 0.87    | 87.0         |
| Tel Aviv       | 1.73 (1e-07)        | 1.74 (0.1)    |                 | 0.67    | 76.1         |
| Jerusalem      | 1.81 (0.06)         | 3.98 (1e-08)  | 3.67 (0.004)    | 0.79    | 88.1         |
| South          | 2.89 (0.004)        |               | 4.78 (7e-11)    | 0.76    | 80.4         |
