# Supplementary material for: Associations between Meteorological Parameters and Influenza Activity in Berlin (Germany), Ljubljana (Slovenia), Castile and León (Spain) and Israeli Districts
Source: PubMed Central journal article supplement (PMC4550247; doi:10.1371/journal.pone.0134701), 2015-08-26
Supplement: pone.0134701.s003.pdf [file pone.0134701.s003.pdf]

## S3 APPENDIX

### Models with Observations from Pandemic Year Included in Training Dataset

#### A. Specific humidity model

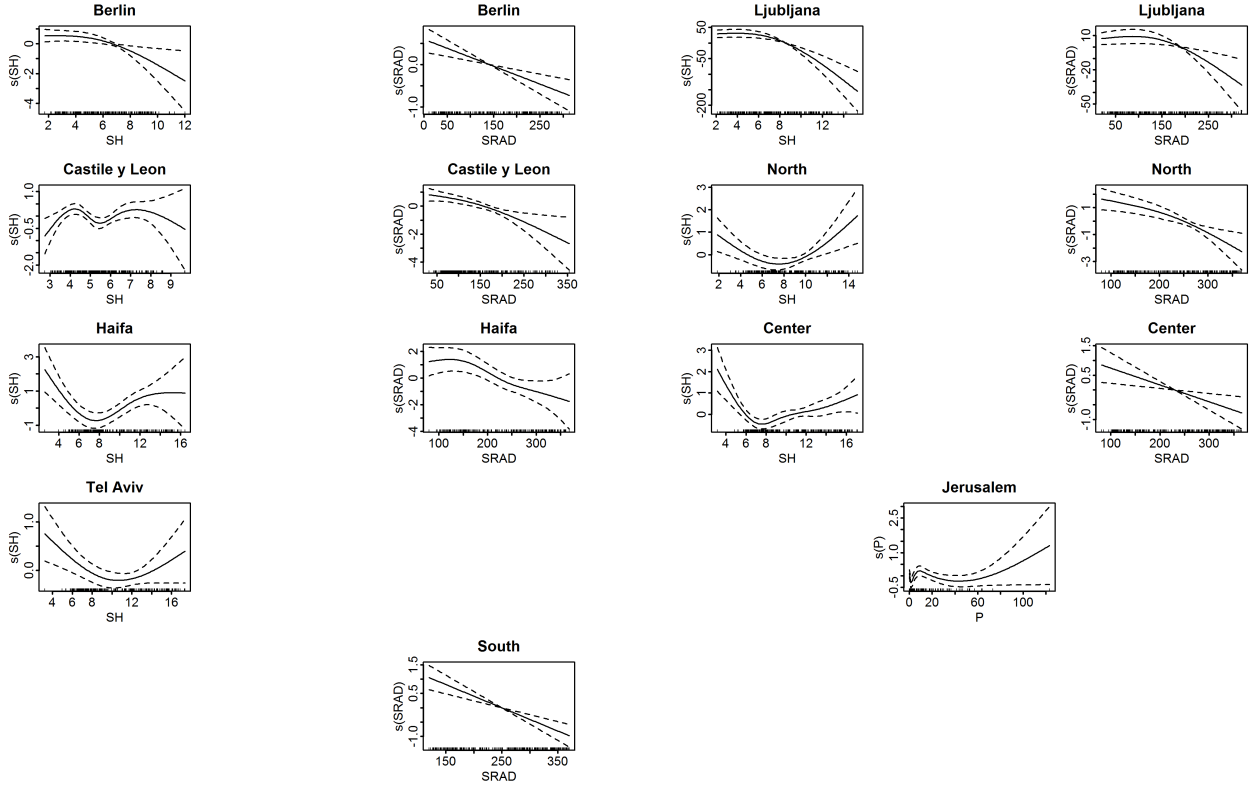

Fig. A. Resulting meteorological smooth terms. Only terms that are significant are plotted. The y-axis is in the log scale and normalized, x-axis is the value of the meteorological variable. SH = Specific Humidity, P = Precipitation, SRAD = Solar Radiation.

Table A. Meteorological smooth term effective degree of freedom and p-value in parenthesis

|                | Specific Humidity | Precipitation | Solar Radiation |
|----------------|-------------------|---------------|-----------------|
| Berlin         | 1.73 (0.006)      |               | 1 (1e-04)       |
| Ljubljana      | 1.99 (1e-05)      | 1.69 (0.06)   | 1.92 (0.007)    |
| Castile Y Leon | 3.74 (0.04)       |               | 1.53 (5e-05)    |
| North          | 1.97 (0.002)      |               | 1.67 (0.001)    |
| Haifa          | 2.79 (2e-04)      | 1 (0.06)      | 2.64 (0.02)     |
| Center         | 3.62 (4e-06)      | 1 (0.08)      | 1 (0.005)       |
| Tel Aviv       | 1.83 (0.01)       |               | 1.05 (0.05)     |
| Jerusalem      | 1.81 (0.6)        | 3.85 (0.008)  | 1.44 (0.1)      |
| South          |                   |               | 1 (1e-06)       |

## B. Minimum temperature model

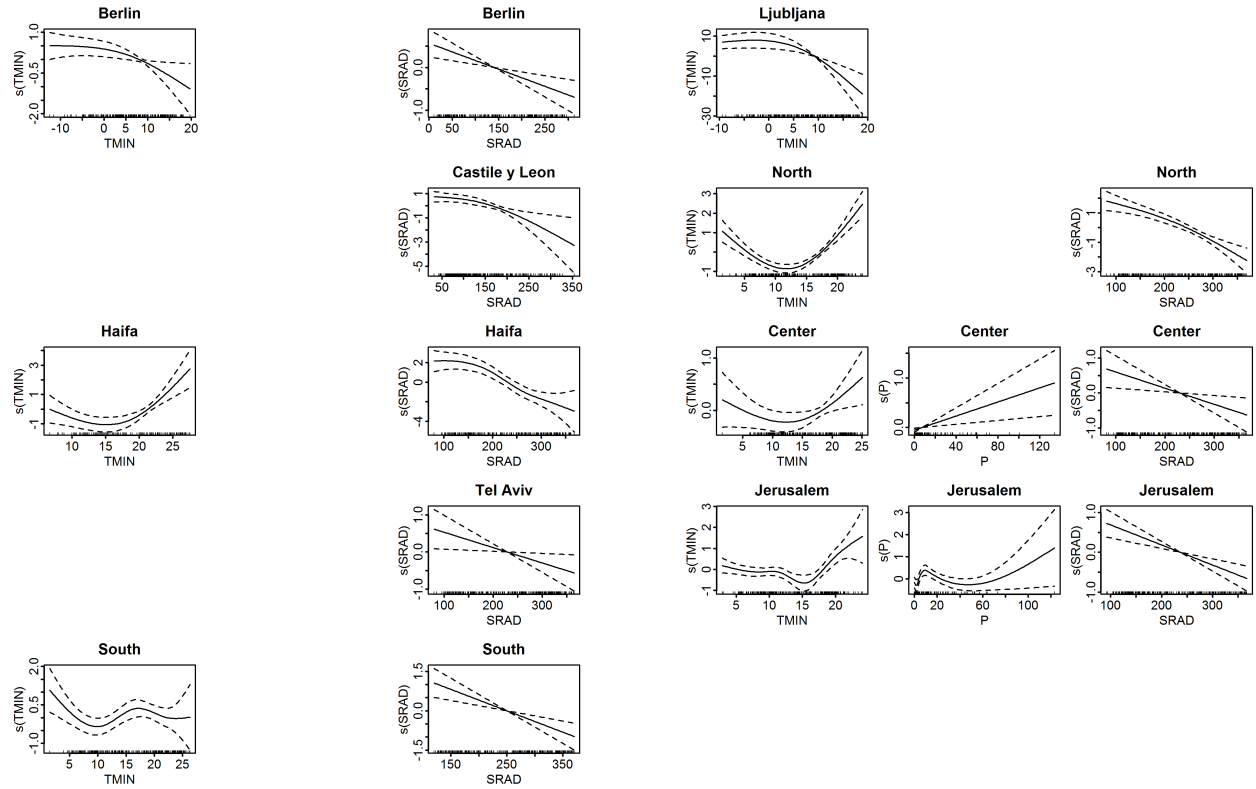

Fig. B. Resulting meteorological smooth terms. Only terms that are significant are plotted. The y-axis is in the log scale and normalized, x-axis is the value of the meteorological variable. TMIN = minimum temperature, P = Precipitation, SRAD = Solar Radiation.

Table B. Meteorological smooth term effective degree of freedom and p-value in parenthesis

|                | Minimum Temperature | Precipitation | Solar Radiation |
|----------------|---------------------|---------------|-----------------|
| Berlin         | 1.65 (0.04)         |               | 1 (5e-04)       |
| Ljubljana      | 1.93 (2e-04)        |               | 1.84 (0.05)     |
| Castile Y Leon |                     |               | 1.69 (1e-04)    |
| North          | 1.99 (3e-13)        |               | 1.65 (8e-08)    |
| Haifa          | 1.97 (2e-04)        |               | 2.88 (6e-06)    |
| Center         | 1.76 (0.03)         | 1 (0.007)     | 1 (0.01)        |
| Tel Aviv       | 2.74 (0.5)          |               | 1 (0.02)        |
| Jerusalem      | 4.48 (4e-04)        | 4.98 (1e-04)  | 1 (4e-05)       |
| South          | 3.2 (0.003)         |               | 1 (2e-04)       |
