# Supplementary material for: Associations between Meteorological Parameters and Influenza Activity in Berlin (Germany), Ljubljana (Slovenia), Castile and León (Spain) and Israeli Districts
Source: PubMed Central journal article supplement (PMC4550247; doi:10.1371/journal.pone.0134701), 2015-08-26
Supplement: pone.0134701.s004.pdf [file pone.0134701.s004.pdf]

S4 APPENDIX  
Models Trained to All Locations Simultaneously

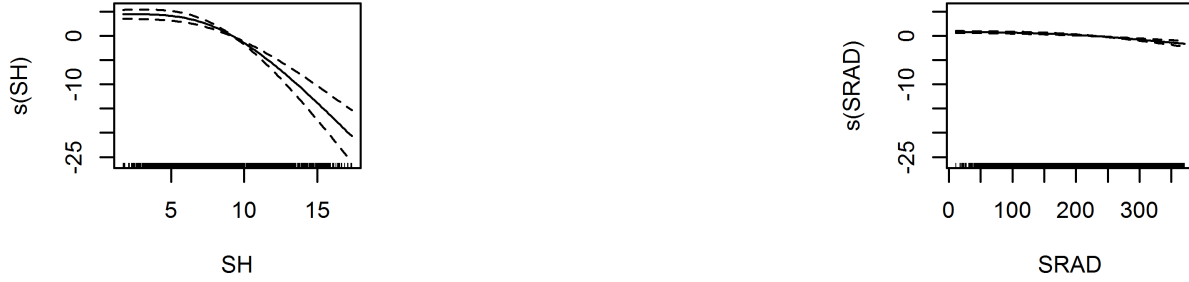

Fig. A. Resulting meteorological smooth terms for Specific Humidity model. The y-axis is in the log scale and normalized, x-axis is the value of the meteorological variable. SH = Specific Humidity, P = Precipitation, SRAD = Solar Radiation.

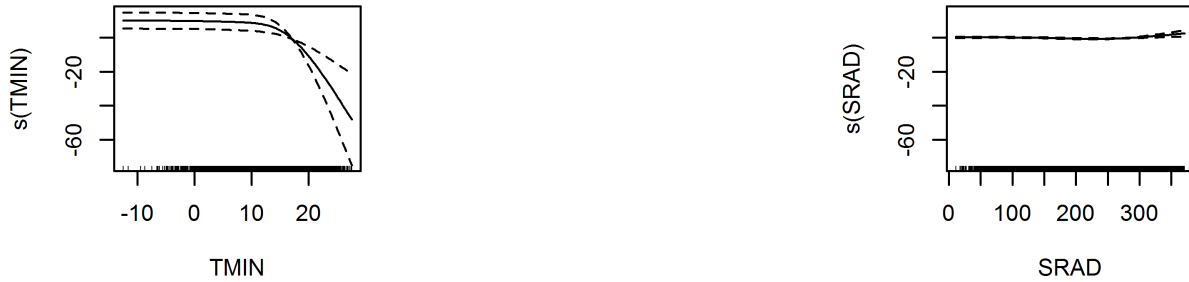

Fig. B. Resulting meteorological smooth terms for Minimum Temperature model. The y-axis is in the log scale and normalized, x-axis is the value of the meteorological variable. TMIN = Minimum Temperature, P = Precipitation, SRAD = Solar Radiation.

Table A. Meteorological smooth term effective degree of freedom and p-value in parenthesis. SH = Specific Humidity, TMIN = Minimum Temperature, P = Precipitation, SRAD = Solar Radiation

|            | SH            | TMIN          | P | SRAD         | Adj.Rsq | % Dev. | Expl. |
|------------|---------------|---------------|---|--------------|---------|--------|-------|
| SH Model   | 1.97 (<2e-16) |               |   | 1.9 (9e-16)  | 0.78    | 78.0   |       |
| TMIN Model |               | 2.91 (<2e-16) |   | 2.91 (1e-09) | 0.79    | 78.1   |       |
